# Supplementary material
Source: PubMed Central journal article supplement (PMC7166199)
Supplement: NIHMS1568683-supplement-8.pdf [file NIHMS1568683-supplement-8.pdf]

**Supplemental Table 1. List of data collection sessions.** Related to STAR Methods section “Session Structure and Cued Movement Tasks”.

| Participant | Date (Post-Implant Day) | Description                                                                                                                                                             | Figure / Video             |
|-------------|-------------------------|-------------------------------------------------------------------------------------------------------------------------------------------------------------------------|----------------------------|
| T5          | 10.22.2018 (796)        | Cued face, head, arm & leg movements. 32 trials per movement.                                                                                                           | Fig 1A-D<br>SFig 1,2,3     |
| T7          | 08.23.2013 (24)         | Cued face, head, arm & leg movements. 18 trials per movement.                                                                                                           | Fig 1A, C, D<br>SFig 1,2,3 |
| T5          | 12.05.2018 (840)        | Cued ipsilateral & contralateral arm and leg movements. 30 trials per movement.                                                                                         | Fig 2, 3,<br>4A-B, SFig 5  |
| T5          | 11.19.2018 (824)        | Cued ipsilateral & contralateral arm and leg movements, focusing on homologous pairs. 20 trials per movement.                                                           | Fig 4C, SFig 5             |
| T5          | 12.10.2018 (845)        | Partially cued movements (laterality). 32 trials per movement condition.                                                                                                | Fig 4D, SFig 6             |
| T5          | 03.27.2019 (952)        | Partially cued movements (arm vs. leg). 31 trials per movement condition.                                                                                               | Fig 4E, SFig 6             |
| T5          | 02.13.2019 (910)        | Four effectors, radial 8 movements (hands and feet). 24 trials per target.                                                                                              | SFig 4B-D                  |
| T5          | 12.05.2018 (840)        | Four effectors, radial 6 movements [arms and legs]. 26 trials per target.                                                                                               | SFig 4E                    |
| T5          | 03.19.2018 (579)        | Simultaneous movement with the following effector pairs: (R-Arm, L-Arm), (R-Arm, Head), (R-Arm, L-Leg), (R-Leg, L-Leg). 18 trials per movement condition.               | Fig 5                      |
| T5          | 03.21.2018 (581)        | Simultaneous movement with the following effector pair: (R-Arm, R-Leg). 18 trials per movement condition.                                                               | Fig 5                      |
| T5          | 04.02.2018 (593)        | Simultaneous movement with the following effector pairs: (R-Leg, Head), (L-Leg, Head), (L-Arm, Head), (R-Leg, L-Arm), (L-Arm, L-Leg). 18 trials per movement condition. | Fig 5                      |
| T5          | 11.05.2018 (810)        | Single-effector radial target layouts with different numbers of targets. 540 trials per layout.                                                                         | Fig 6B                     |
| T5          | 01.07.2019 (873)        | 16-target layouts with 1 effector, 2 effectors, or 4 effectors. 355 trials per layout.                                                                                  | Fig 6C-E                   |
| T5          | 09.19.2018 (763)        | Closed-loop discrete decoding with a four-effector layout (900 trials per layout)                                                                                       | Fig 6F-G, SVid 1           |
| T5          | 09.26.2018 (770)        | Closed-loop discrete decoding with a two-effector layout                                                                                                                | Fig 6F                     |
| T5          | 10.01.2018 (775)        | Closed-loop discrete decoding with a one-effector layout and 32-target layout                                                                                           | Fig 6F, SVid 2             |
| T5          | 10.03.2018 (777)        | Closed-loop discrete decoding with a four-effector layout and one-effector layout                                                                                       | Fig 6F                     |
| T5          | 10.08.2018 (782)        | Closed-loop discrete decoding with a two-effector layout and 32-target layout                                                                                           | Fig 6F                     |
| T5          | 10.10.2018 (784)        | Closed-loop discrete decoding with a four-effector layout and one-effector layout                                                                                       | Fig 6F                     |
| T5          | 10.15.2018 (789)        | Closed-loop discrete decoding with a two-effector layout and 32-target layout                                                                                           | Fig 6F                     |

**Supplemental Table 2: Motor power & reflex exam results for T5 and T7.** Related to STAR Methods section “Experimental Model and Subject Details”.

Motor Power Key: (0=Nothing, 1=Muscle Twitch but no Joint Movement, 2=Some Joint Movement, 3=Overcomes Gravity, 4=Overcomes Some Resistance, 5=Overcomes Full Resistance).

Reflex Testing Key: (0=Areflexive, 1=Hyporeflexive, 2=Normal, 3=Brisk, 4=Clonus).

| <b>Muscle Group</b>        | T5 Left (Ipsi.) | T5 Right (Contra.) | T7 Left (Ipsi.) | T7 Right (Contra.)            |
|----------------------------|-----------------|--------------------|-----------------|-------------------------------|
| Cervical Flexion           | 5               |                    | 4               |                               |
| Cervical Extension         | 5               |                    | 4               |                               |
| Cervical Sidebend          | 5               | 5                  | 4               | 4                             |
| Cervical Rotation          | 5               | 5                  | 4               | 4                             |
| Hip Flexion                | 2               | 1                  | 4               | 4                             |
| Hip Extension              | 2               | 1                  | 4               | 4                             |
| Hip Abduction              | 1               | 2                  | 4               | 4                             |
| Hip Adduction              | 1               | 1                  | 4               | 4                             |
| Knee Flexion               | 2               | 2                  | 4               | 4                             |
| Knee Extension             | 2               | 2                  | 4               | 5                             |
| Ankle Dorsiflexion         | 0               | 1                  | 3               | 4                             |
| Ankle Plantarflexion       | 1               | 2                  | 4               | 4                             |
| Shoulder Flexion           | 3               | 1                  | 2               | 2                             |
| Shoulder Extension         | 3               | 2                  | 2               | Not tested due to positioning |
| Shoulder Internal Rotation | 2               | 0                  | 2               | 3                             |
| Shoulder External Rotation | 2               | 2                  | 1               | 1                             |
| Elbow Flexion              | 5               | 0                  | 2               | 2                             |
| Elbow Extension            | 1               | 1                  | 2               | 3                             |
| Wrist Flexion              | 0               | 0                  | 2               | 3                             |
| Wrist Extension            | 1               | 2                  | 1               | 3                             |
| Finger Flexion             | 0               | 0                  | 2               | 4                             |
| Finger Extension           | 3               | 2                  | 1-3             | 2-3                           |
|                            |                 |                    |                 |                               |
| <b>Reflex</b>              | T5 Left (Ipsi.) | T5 Right (Contra.) | T7 Left (Ipsi.) | T7 Right (Contra.)            |
| Biceps                     | 3               | 3                  | 2               | 2                             |
| Brachioradialis            | 3               | 3                  | 2               | 2                             |
| Triceps                    | 3               | 3                  | 1               | 0                             |
| Patella                    | 3               | 3                  | 3               | 3                             |
| Achilles                   | 0               | 0                  | 4               | 4                             |
